# Supplementary material
Source: MDPI journal article supplement (https://www.mdpi.com/2673-6209/1/4/17)
Supplement: s1 [file s1]

## Electronic Supplementary Information

### Aspects of the Synthesis of Poly(styrene-*block*-isobutylene-*block*-styrene) by TiCl<sub>4</sub>-Co-initiated Cationic Polymerization in Open Conditions

Miraslau I. Makarevich<sup>1,2</sup>, Pavel A. Nikishau<sup>1,2</sup>, Ivan A. Berezianko<sup>1</sup>, Tatiana V. Glushkova<sup>3</sup>, Maria A. Rezvova<sup>3</sup>, Evgeny A. Ovcharenko<sup>3</sup>, Giyjaz E. Bektukhamedov<sup>4,5</sup>, Dmitry G. Yakhvarov<sup>4,5</sup> and Sergei V. Kostjuk<sup>1,2,6,\*</sup>

<sup>1</sup> *Research Institute for Physical Chemical Problems of the Belarusian State University, 220006 Minsk, Belarus*

<sup>2</sup> *Faculty of Chemistry, Belarusian State University, 220006 Minsk, Belarus*

<sup>3</sup> *Research Institute for Complex Issues of Cardiovascular Diseases, 650002 Kemerovo, Russia*

<sup>4</sup> *Alexander Butlerov Institute of Chemistry, Kazan Federal University, Kazan 420008, Russian Federation;*

<sup>5</sup> *Arbuzov Institute of Organic and Physical Chemistry, Federal Research Center of the Russian Academy of Sciences, 420088 Kazan, Russian Federation*

<sup>6</sup> *Institute of Regenerative Medicine, Sechenov First Moscow State Medical University (Sechenov University), 119991 Moscow, Russia*

\* Correspondence: kostjuks@bsu.by; Tel.: +375-2-7507994

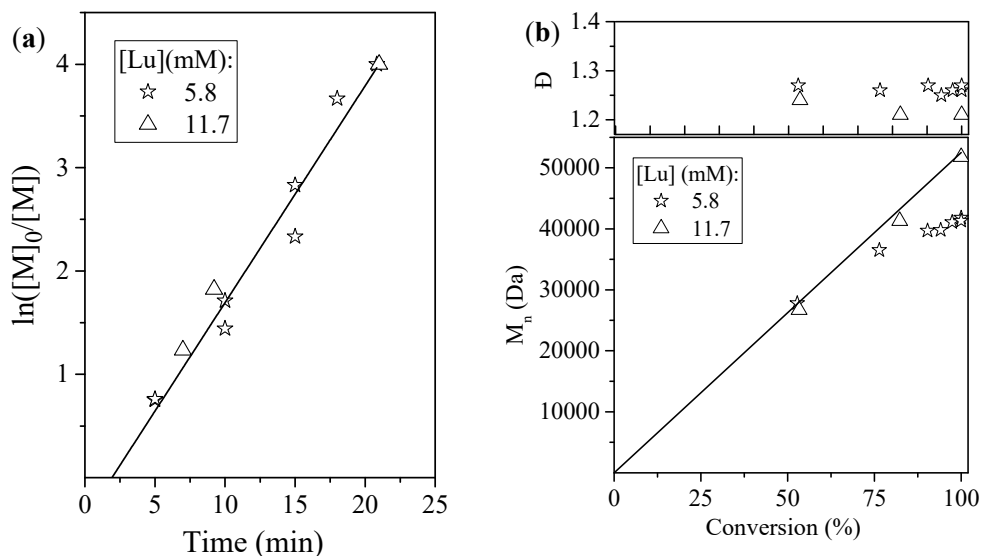

**Figure S1.** (a) First-order plots and (b)  $M_n$ ,  $\bar{D}$  vs. conversion dependences for cationic polymerization of isobutylene at with DiCumCl/TiCl<sub>4</sub>/Lu initiating system in CH<sub>2</sub>Cl<sub>2</sub>/MCH 40:60 v/v at different proton trap concentrations at  $-80$  °C:  $[IB]=1.0$  M;  $[TiCl_4]=90$  mM;  $[DiCumCl]=1.1$  mM.

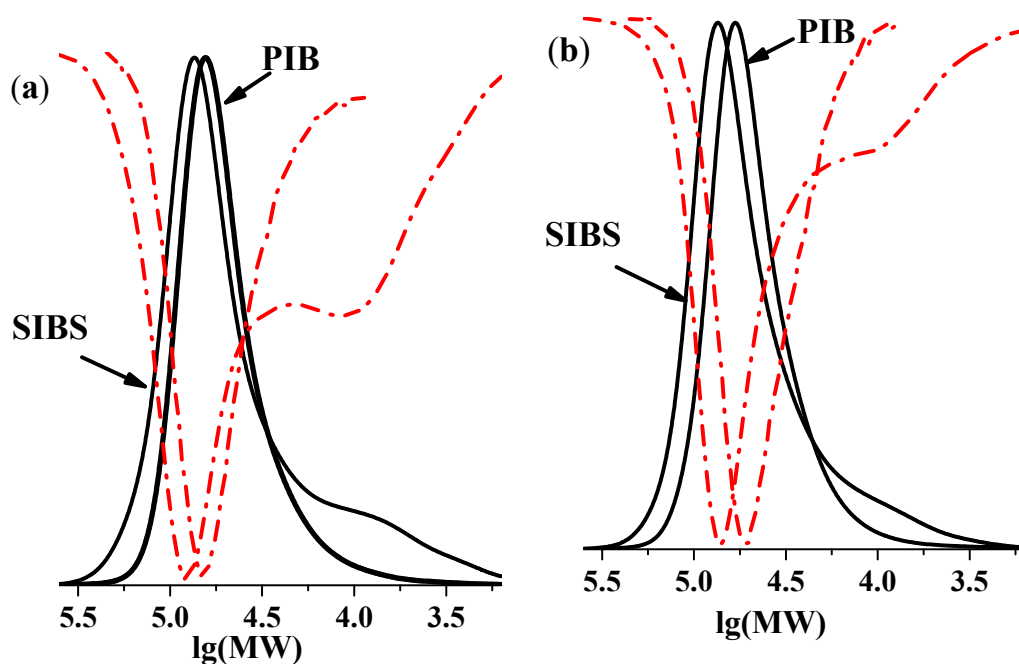

**Figure S2.** RI (solid line) and UV (dashed line) SEC traces of polyisobutylenes and corresponding SIBSs obtained with DiCumCl/TiCl<sub>4</sub>/Lu initiating system in CH<sub>2</sub>Cl<sub>2</sub>/MCH 40:60 v/v at  $-80$  °C and at different concentration of proton trap. Concentration of proton trap: (a) 0 mM (run 3, Table 1); (b) 5.8 mM (run 4, Table 1).
